# Supplementary material for: Live fast, diversify non-adaptively: evolutionary diversification of exceptionally short-lived annual killifishes
Source: PubMed Central journal article supplement (PMC6327596; doi:10.1186/s12862-019-1344-0), 2019-01-09

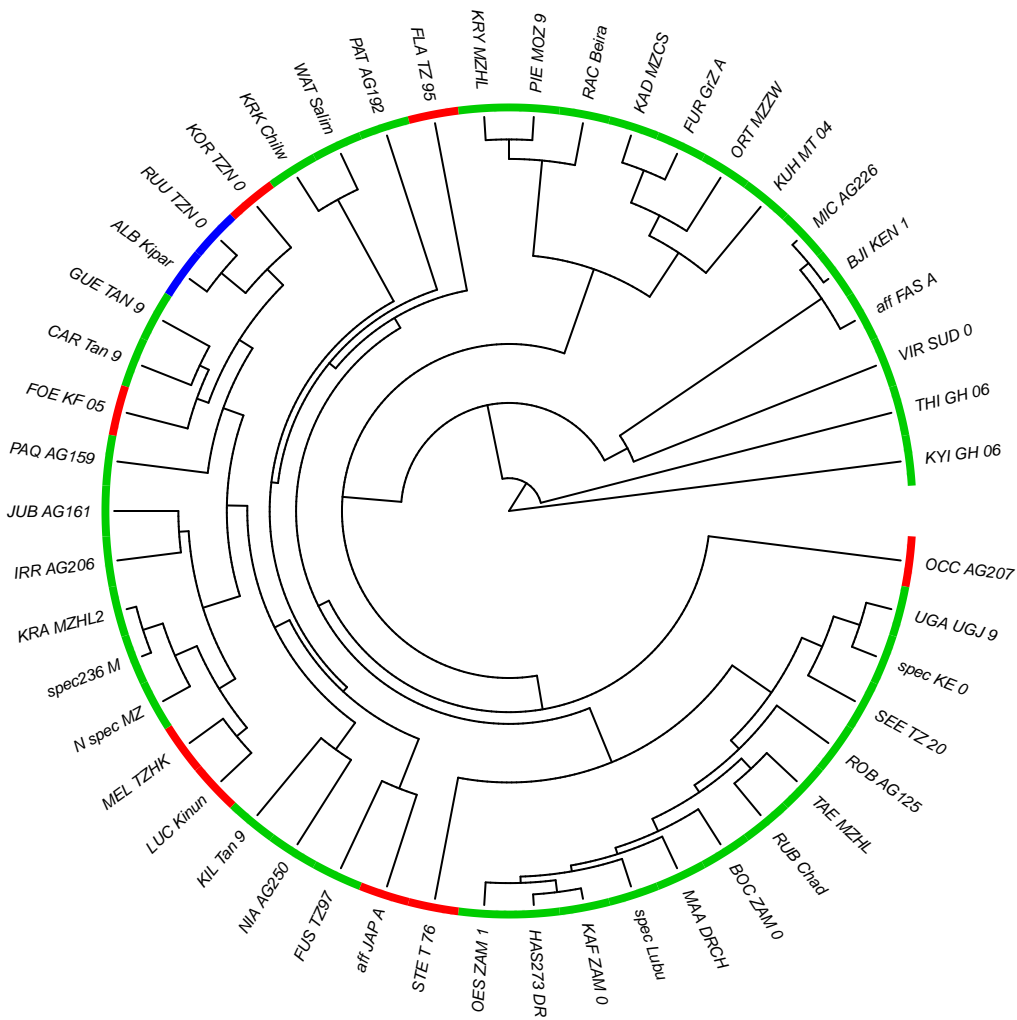

Supplement: 12862_2019_1344_MOESM7_ESM.pdf [file 12862_2019_1344_MOESM7_ESM.pdf]
